# Supplementary material
Source: PubMed Central journal article supplement (PMC6726540)
Supplement: NIHMS1532467-supplement-4.pdf [file NIHMS1532467-supplement-4.pdf]

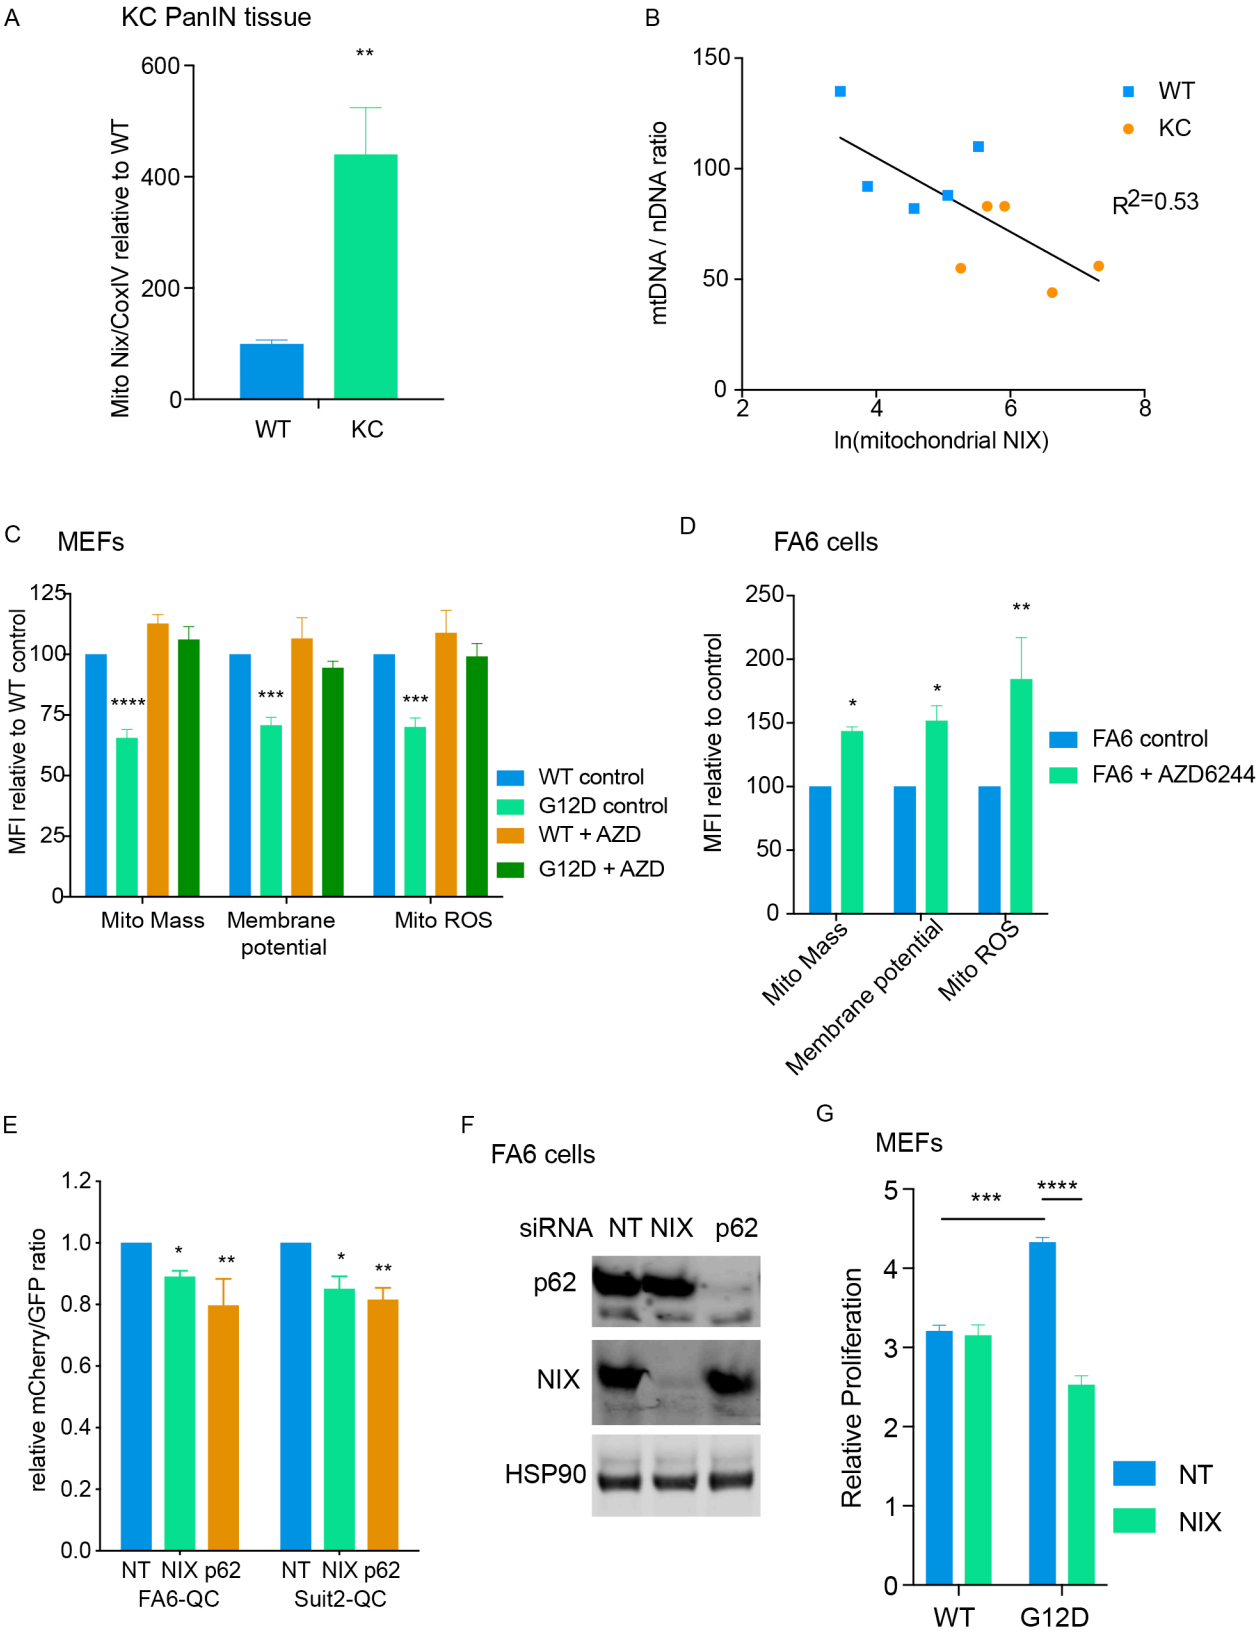

**Supplementary Figure 4. Nix mediates mitophagy and proliferation in glucose-limited conditions *in vitro*.**

A) Quantification of mitochondrial Nix protein levels relative to CoxIV in the pancreata of WT and KC PanIN mice (western blot shown in Figure 3A). B) Inverse linear relationship between the mtDNA/nDNA ratio and the natural log (ln) of mitochondrial Nix levels in the samples from (A). C) Median fluorescence intensity LSL-KrasG12D MEFs infected with Adeno-Empty (WT) or Adeno-Cre (G12D) treated with DMSO control or AZD6244 for 24 hours and stained MitoTracker Green, DiIc15 and MitoSox Red (Mitochondrial mass, Membrane potential and mitochondrial ROS, respectively). Two-way ANOVA with Holm-Sidak test. D) FA6 cells treated with DMSO control or AZD6244 and analyzed by flow cytometry as in (C). E) Relative ratio of mCherry fluorescence to GFP fluorescence for siNT, siNIX, and siP62-treated FA6 and Suit2 cells stably expressing mitoQC reporter cultured in low glucose medium, n=3 experiments per cell line per siRNA. F) Immunoblot for p62, NIX protein with HSP90 protein as loading control for siNT, siNIX, and sip62 FA6 cells. G) Relative proliferation ratio (Day 3/Day 1 counts) for LSL-KrasG12D MEFs infected with Adeno-Empty (WT) or Adeno-Cre (G12D) and then treated with control (NT) or Nix siRNA for 48 hours and then allowed to grow in 25 mM glucose-containing medium for 3 days.
