# Supplementary material
Source: PubMed Central journal article supplement (PMC6726540)
Supplement: NIHMS1532467-supplement-6.pdf [file NIHMS1532467-supplement-6.pdf]

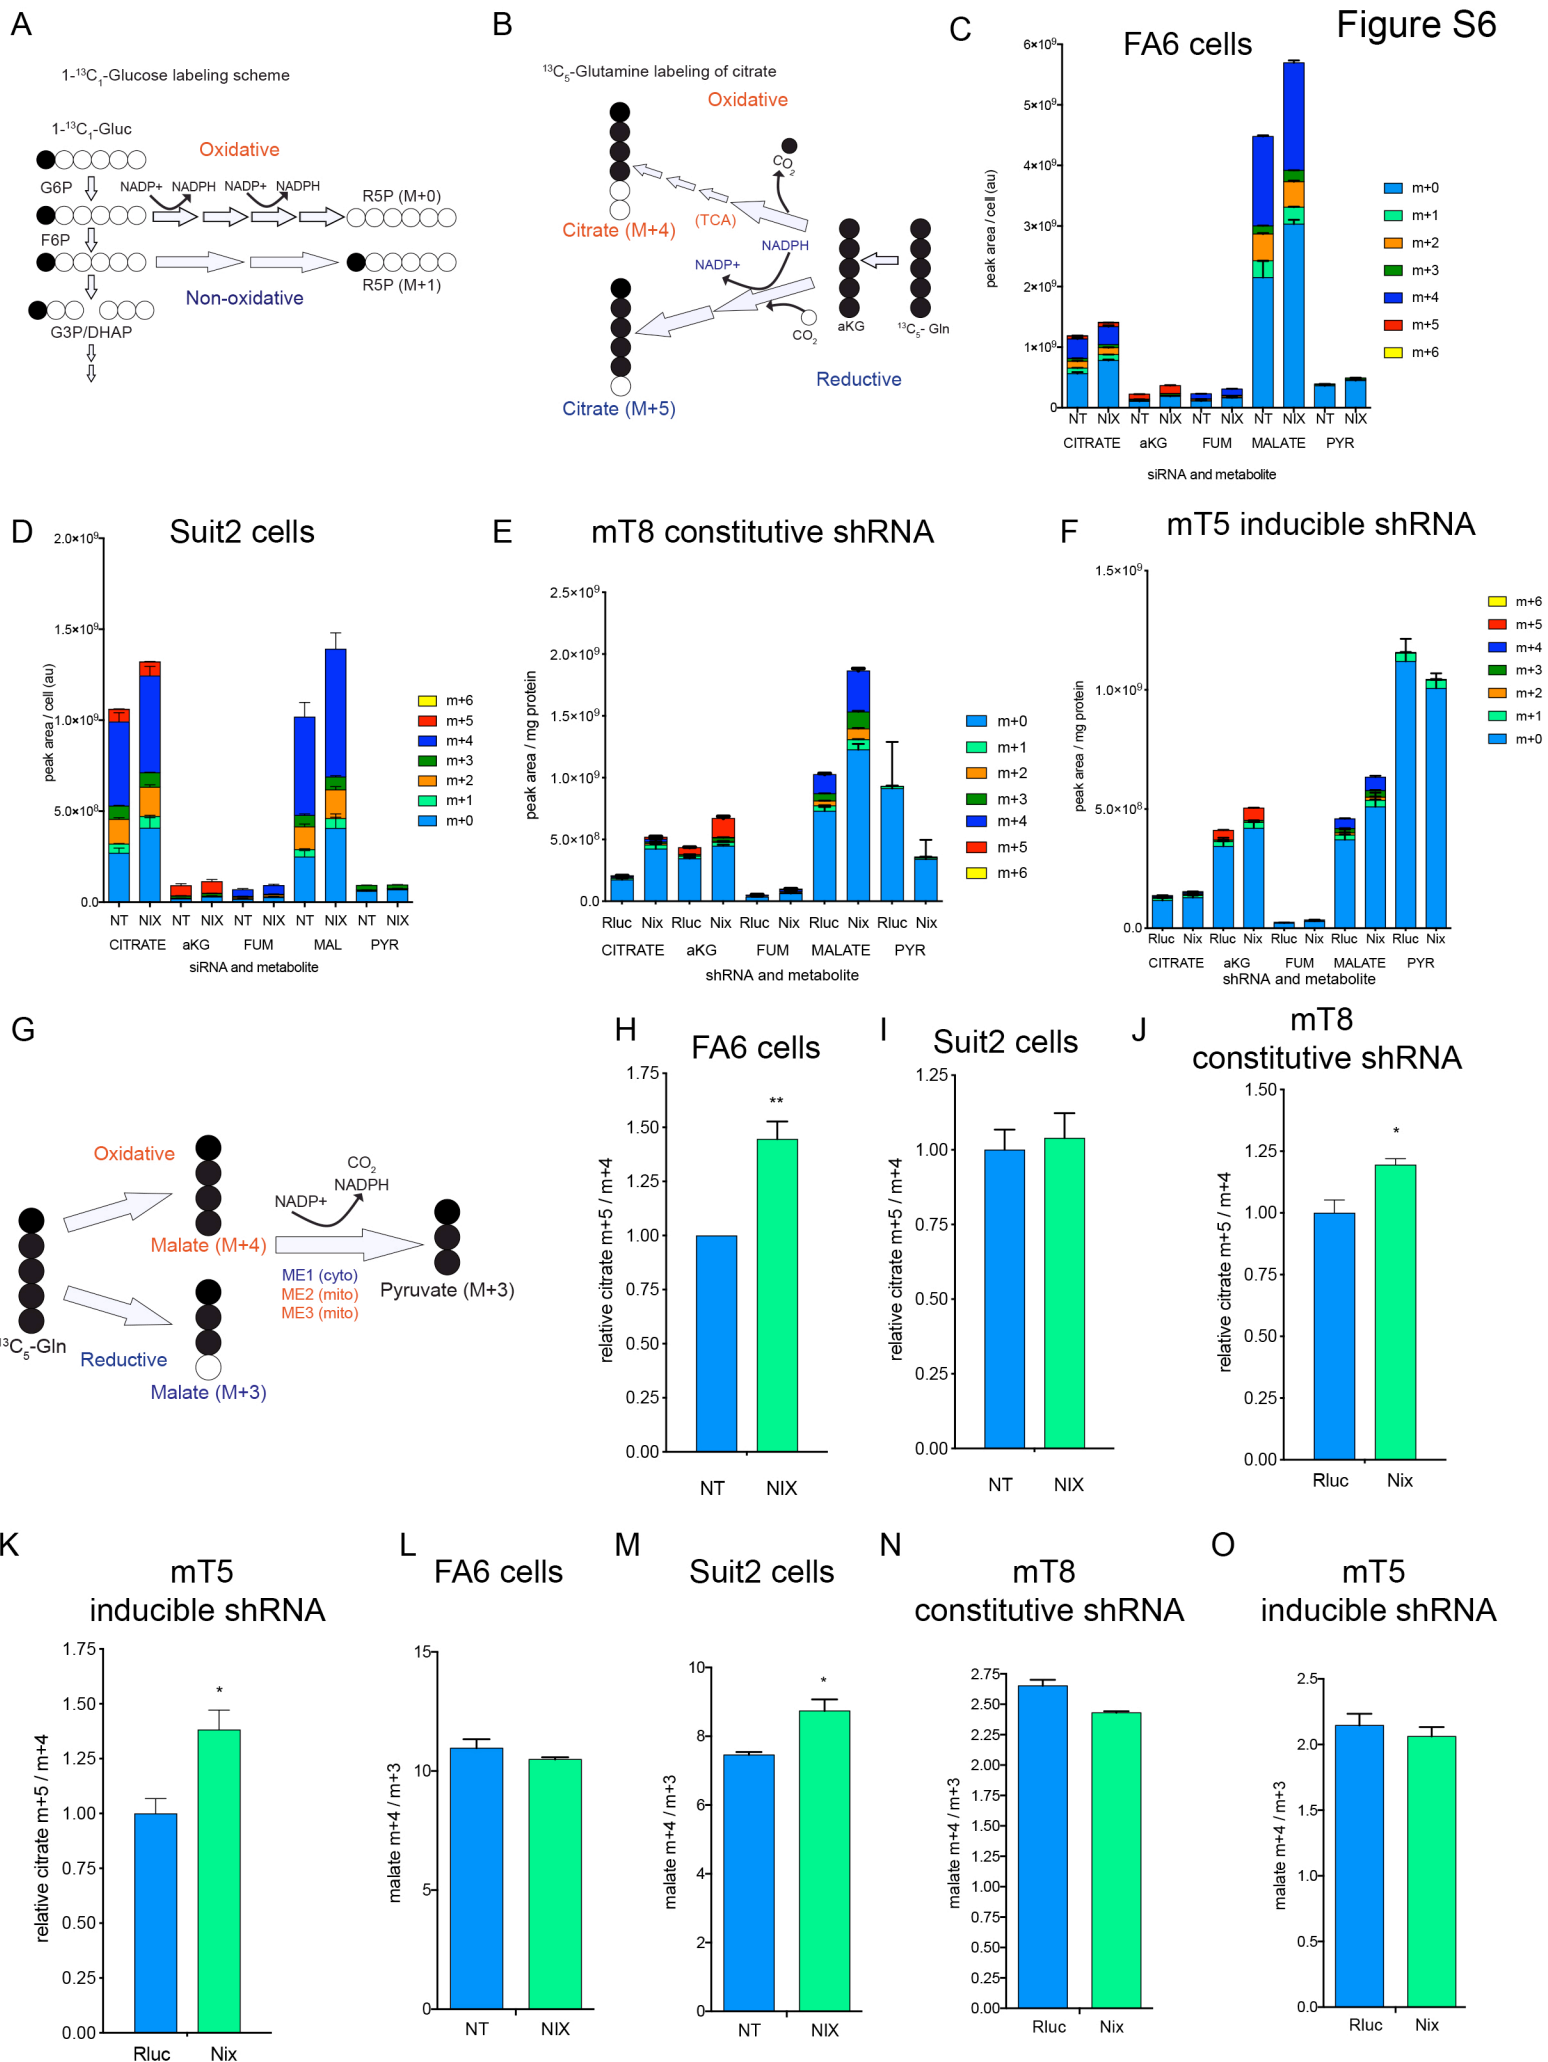

**Supplementary Figure 6. Nix-depleted cells induce the flux of glucose to the oxPPP and the reductive carboxylation of glutamine to support NADPH production *in vitro*.**

A) Schematic of 1-<sup>13</sup>C<sub>1</sub>-glucose labeling in oxidative and non-oxidative branches of PPP in FA6 cells. B) Schematic of reductive carboxylation vs. oxidative metabolism of <sup>13</sup>C<sub>5</sub>, <sup>15</sup>N<sub>2</sub>-glutamine to citrate. C/D) Isotopologue analysis of TCA cycle intermediates for siNT and siNIX FA6 (C) and Suit2 (D) cells cultured for 45' with 2mM <sup>13</sup>C<sub>5</sub>, <sup>15</sup>N<sub>2</sub>-glutamine. n=4 (FA6) or n=3 (Suit2) independent experiments. E/F) isotopologue analysis (peak area normalized by mg protein) of TCA cycle intermediates for mT8 LEPG.shRluc713 or LEPG.shNix447 organoids (E) and mT5 RT3.shRluc713 or shNix447 organoids (F) cultured for 45' with 2mM <sup>13</sup>C<sub>5</sub>, <sup>15</sup>N<sub>2</sub>-glutamine, n=3 technical replicates. G) Schematic of reductive carboxylation vs. oxidative metabolism of <sup>13</sup>C<sub>5</sub>, <sup>15</sup>N<sub>2</sub>-glutamine to malate. H/I) Ratio of citrate (m+5) to citrate (m+4) from siNT and siNIX FA6 (H) and Suit2 (I) cells cultured with <sup>13</sup>C<sub>5</sub>, <sup>15</sup>N<sub>2</sub>-glutamine. n=4 (FA6) or n=3 (Suit2) independent experiments. J/K) Ratio of citrate (m+5) to citrate (m+4) from mT8 LEPG.shRluc713 or LEPG.shNix447 organoids (J) and mT5 RT3.shRluc713 or shNix447 organoids (K) cultured with <sup>13</sup>C<sub>5</sub>, <sup>15</sup>N<sub>2</sub>-glutamine, n=3 technical replicates. L/M) Ratio of malate (m+4) to malate (m+3) from siNT and siNIX FA6 (L) and Suit2 (M) cells cultured with <sup>13</sup>C<sub>5</sub>, <sup>15</sup>N<sub>2</sub>-glutamine. n=4 (FA6) or n=3 (Suit2) independent experiments. N/O) Ratio of malate (m+4) to malate (m+3) from mT8 LEPG.shRluc713 or LEPG.shNix447 organoids (N) and mT5 RT3.shRluc713 or shNix447 organoids (O) cultured with <sup>13</sup>C<sub>5</sub>, <sup>15</sup>N<sub>2</sub>-glutamine, n=3 technical replicates.
