# Supplementary material
Source: PubMed Central journal article supplement (PMC6726540)
Supplement: NIHMS1532467-supplement-7.pdf [file NIHMS1532467-supplement-7.pdf]

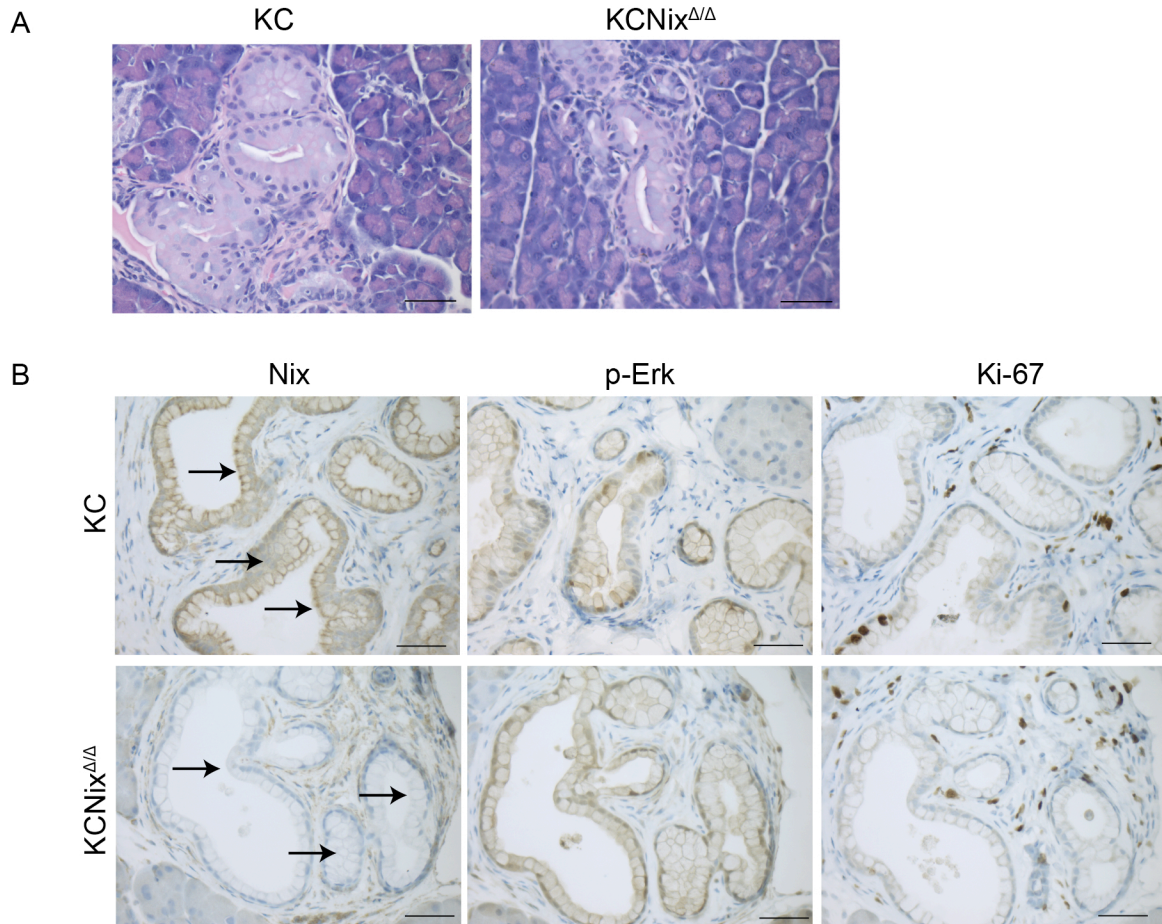

**Supplementary Figure 7. PanIN lesions in Nix knockout KC pancreata resemble those found in Nix WT controls at an early timepoint.**

A) Representative H&E images of pancreata from 3-month-old KC and KCNix<sup>Δ/Δ</sup> mice. Scale bar (left): 100  $\mu$ m. Scale bar (right): 50  $\mu$ m. B) Representative images of IHC staining for Nix, Ki67 and p-Erk in pancreata from 3-month-old KC and KCNix<sup>Δ/Δ</sup> mice. Scale bar (left)=100 $\mu$ m.
